# Supplementary material for: Modulation of SOD1 Subcellular Localization by Transfection with Wild- or Mutant-type SOD1 in Primary Neuron and Astrocyte Cultures from ALS Mice
Source: PubMed Central journal article supplement — Exp Neurobiol. 2015 Sep 9;24(3):226–34. doi: 10.5607/en.2015.24.3.226 (PMC4580750; doi:10.5607/en.2015.24.3.226), 2015-09-09
Supplement: en-24-226-s001.pdf [file en-24-226-s001.pdf]

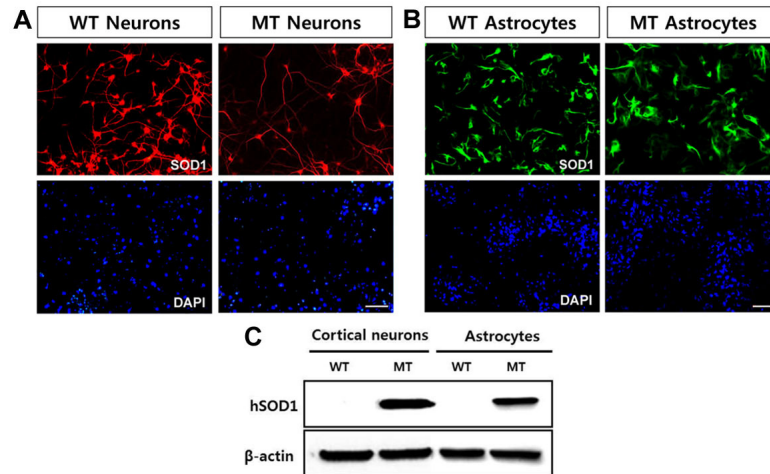

**Supplementary Fig. 1.** Cellular and morphological characterization of neurons and astrocytes enriched cultures. (A, B) Immunofluorescent staining for SOD1 of cortical neurons (red) and astrocytes (green) with DAPI for nuclei (blue). (C) Western blot analysis confirmed the presence of the human SOD1 in cortical neurons and astrocytes. Levels of hSOD1 in both mutant cortical neurons and mutant astrocytes identified compared with wild-type.
